# Supplementary material
Source: Research Square preprint supplement (doi:10.21203/rs.3.rs-9082814/v1)
Supplement: Supplementary file 1 [file dd83309d573acb64cd0689ff.xlsx]

## Sheet: MainInfo
Description

## Sheet: AnnualSciProd
Year

## Sheet: AnnualSciProd(2)
Year

## Sheet: AnnualCitPerYear
Year

## Sheet: AnnualCitPerYear(2)
Year

## Sheet: MostRelSources
Sources

## Sheet: MostRelSources(2)
Sources

## Sheet: BradfordLaw
SO

## Sheet: BradfordLaw(2)
SO

## Sheet: SourceLocImpact
Source

[truncated: 66 more sheets: SourceLocImpact(2), SourceProdOverTime, SourceProdOverTime(2), MostRelAuthors, MostRelAuthors(2), AuthorProdOverTime, AuthorProdOverTime(2), AuthorProdOverTime(3), LotkaLaw, LotkaLaw(2), AuthorLocImpact, AuthorLocImpact(2), MostRelAffiliations, MostRelAffiliations(2), AffOverTime, AffOverTime(2), CorrAuthCountries, CorrAuthCountries(2), CountrySciProd, CountrySciProd(2) …]
